# Supplementary material
Source: MDPI journal article supplement (https://www.mdpi.com/2076-3417/12/9/4316)
Supplement: s1 [file s1]

Supplementary

# Zeolite H-Beta as a Dispersive Solid-Phase Extraction Sorbent for the Determination of Eight Neonicotinoid Insecticides Using Ultra-High-Performance Liquid Chromatography—Tandem Mass Spectrometry

Wenshuai Si <sup>1,2,†</sup>, Shouying Wang <sup>1,†</sup>, Bing Bai <sup>1</sup>, Nan Wu <sup>1</sup>, Tai Ye <sup>2</sup>, Fei Xu <sup>2,\*</sup> and Cong Kong <sup>3,\*</sup>

<sup>1</sup> Institute for Agri-Food Standards and Testing Technology, Shanghai Academy of Agricultural Sciences, 1000 Jinqi Road, Shanghai 201403, China; siwenshuai021@163.com (W.S.); magnolia7319@163.com (S.W.); whitebing2@hotmail.com (B.B.); neowunan@163.com (N.W.)

<sup>2</sup> School of Health Science and Engineering, University of Shanghai for Science and Technology, 516 Jungong Road, Shanghai 200093, China; taiye@usst.edu.cn (T.Y.)

<sup>3</sup> Key Laboratory of East China Sea Fishery Resources Exploitation, Ministry of Agriculture and Rural Affairs, East China Sea Fisheries Research Institute, Chinese Academy of Fishery Sciences, Shanghai 200090, China

\* Correspondence: xufei8135@126.com (F.X.); kongc@ecsf.ac.cn (C.K.)

† These authors contributed equally to this work.

**Table S1.** Parameters for UHPLC-MS/MS determination and the method performance in linearity, LODs and LOQs.

| Neonicotinoid Insecticides | Compound Formula                                                 | RT (min) | Precursor Ions (m/z) | MRM Transitions (m/z) | CE (eV) | Linear Range (ng/mL) | Regression Equation                             | R <sup>2</sup> | LODs/LOQs     |              |
|----------------------------|------------------------------------------------------------------|----------|----------------------|-----------------------|---------|----------------------|-------------------------------------------------|----------------|---------------|--------------|
|                            |                                                                  |          |                      |                       |         |                      |                                                 |                | Water (ng/mL) | Honey (ng/g) |
| Acetamiprid                | C <sub>10</sub> H <sub>11</sub> ClN <sub>4</sub>                 | 4.06     | 223.0                | 126.0/99.0            | 36/41   | 1.0–100              | y=2.08×10 <sup>8</sup> x+5.38×10 <sup>4</sup>   | 0.9995         | 0.05/0.1      | 0.5/1.0      |
| Clothianidin               | C <sub>6</sub> H <sub>8</sub> ClN <sub>5</sub> O <sub>2</sub> S  | 3.90     | 250.0                | 169.1/132.0           | 18/19   | 1.0–100              | y=4.89×10 <sup>7</sup> x + 1.13×10 <sup>4</sup> | 0.9999         | 0.1/0.2       | 1.0/2.0      |
| Dinotefuran                | C <sub>7</sub> H <sub>14</sub> N <sub>4</sub> O <sub>3</sub>     | 3.11     | 203.1                | 129.0/157.0           | 16/31   | 1.0–100              | y=1.49×10 <sup>8</sup> x + 8.82×10 <sup>4</sup> | 0.9982         | 0.1/0.2       | 1.0/2.0      |
| Flonicamid                 | C <sub>9</sub> H <sub>6</sub> F <sub>3</sub> N <sub>3</sub> O    | 3.51     | 230.0                | 203.0/148.0           | 14/36   | 1.0–100              | y=5.92×10 <sup>6</sup> x – 2.91×10 <sup>3</sup> | 0.9984         | 0.1/0.2       | 1.0/2.0      |
| Imidacloprid               | C <sub>9</sub> H <sub>10</sub> ClN <sub>5</sub> O <sub>2</sub>   | 3.88     | 256.1                | 175.0/209.0           | 24/20   | 1.0–100              | y=5.03×10 <sup>7</sup> x – 8.00×10 <sup>3</sup> | 0.9999         | 0.05/0.1      | 0.5/1.0      |
| Imidaclothiz               | C <sub>7</sub> H <sub>8</sub> ClN <sub>5</sub> O <sub>2</sub> S  | 3.98     | 262.1                | 181.1/122.0           | 31/38   | 1.0–100              | y=3.47×10 <sup>7</sup> x + 3.49×10 <sup>3</sup> | 0.9999         | 0.1/0.2       | 1.0/2.0      |
| Thiacloprid                | C <sub>10</sub> H <sub>9</sub> ClN <sub>4</sub> S                | 4.22     | 253.1                | 126.1/99.1            | 27/17   | 1.0–100              | y=3.00×10 <sup>8</sup> x + 1.71×10 <sup>5</sup> | 0.9986         | 0.05/0.1      | 0.5/1.0      |
| Thiamethoxam               | C <sub>8</sub> H <sub>10</sub> ClN <sub>5</sub> O <sub>3</sub> S | 3.58     | 292.0                | 211.0/181.0           | 24/33   | 1.0–100              | y=8.59×10 <sup>7</sup> x + 1.07×10 <sup>4</sup> | 0.9999         | 0.1/0.2       | 1.0/2.0      |

**Table S2.** The detailed information of honey and bottled water.

| Sample No. | Brand/Manufacture No. | Ingredient   | Place of Origin                  |
|------------|-----------------------|--------------|----------------------------------|
| 1          | H-1                   | Honey        | Hangzhou City, Zhejiang Province |
| 2          | H-2                   | Native honey | Hangzhou City, Zhejiang Province |
| 3          | H-3                   | Acacia honey | Fengxian District, Shanghai      |
| 4          | H-4                   | Honey        | Dongcheng District, Beijing      |
| 5          | H-3                   | Acacia honey | Fengxian District, Shanghai      |

|    |      |                                                              |                                    |
|----|------|--------------------------------------------------------------|------------------------------------|
| 6  | H-5  | Jinghua honey, Huaixiang honey                               | Langfang City, Hebei Province      |
| 7  | H-6  | Multi-flowered (mixed) honey                                 | Quzhou City, Zhejiang Province     |
| 8  | H-4  | Mature Chinese wolfberry honey                               | Dongcheng District, Beijing        |
| 9  | H-5  | Tilia honey, acacia honey, mountain flower honey, rape honey | Jiamusi, Heilongjiang              |
| 10 | H-6  | Tilia honey                                                  | Quzhou City, Zhejiang Province     |
| 11 | H-3  | Acacia honey                                                 | Fengxian District, Shanghai        |
| 12 | H-7  | Acacia honey                                                 | Nanjing City, Jiangsu Province     |
| 13 | H-8  | Native honey                                                 | Taihang Mountain in Henan Province |
| 14 | H-9  | Tilia honey                                                  | Fengxian District, Shanghai        |
| 15 | H-10 | Honey                                                        | Kunming City, Yunnan Province      |
| 16 | H-11 | Native honey                                                 | Weifang City, Shandong Province    |
| 17 | H-12 | Native honey                                                 | Huanggang City, Hubei Province     |
| 18 | H-13 | Native honey                                                 | Huanggang City, Hubei Province     |
| 19 | H-14 | Honey and Honeycomb                                          | Henan Province                     |
| 20 | H-15 | Native honey                                                 | Dingzhou City, Hebei Province      |
| 21 | H-16 | Natural royal jelly                                          | Anyang City, Henan Province        |
| 22 | H-17 | Native honey                                                 | Weifang City, Shandong Province    |
| 23 | H-18 | Native honey                                                 | Quzhou City, Zhejiang Province     |
| 24 | H-19 | Natural royal jelly                                          | Kaifeng City, Henan Province       |
| 25 | W-1  | Packaged drinking water                                      | Hangzhou City, Zhejiang Province   |
| 26 | W-2  | Drinking natural mineral water                               | Guangzhou City, Guangdong Province |
| 27 | W-3  | Purified drinking water                                      | Shenzhen City, Guangdong Province  |
| 28 | W-4  | Purified drinking water                                      | Shenzhen City, Guangdong Province  |
| 29 | W-5  | Natural water                                                | Hangzhou City, Zhejiang Province   |
| 30 | W-6  | Packaged drinking water                                      | Tonglu County, Zhejiang Province   |
| 31 | W-7  | Natural mineral water                                        | Wuhan City, Hubei Province         |
| 32 | W-3  | Drinking natural mineral water                               | Shenzhen City, Guangdong Province  |
| 33 | W-8  | Natural mineral water                                        | Hangzhou City, Zhejiang Province   |
| 34 | W-9  | Drinking natural mineral water                               | Guangzhou City, Guangdong Province |
| 35 | W-10 | Packaged drinking water                                      | Pudong District, Shanghai          |

**Table S3.** Recoveries, intra- and interday precisions of eight neonicotinoid insecticides in bottled waters and honey products.

| Compounds    | Bottled Waters        |                |                |                | Honey Products       |                |                |                |
|--------------|-----------------------|----------------|----------------|----------------|----------------------|----------------|----------------|----------------|
|              | Spiked levels (ng/mL) | Recoveries (%) | Intra-RSDs (%) | Inter-RSDs (%) | Spiked levels (ng/g) | Recoveries (%) | Intra-RSDs (%) | Inter-RSDs (%) |
| Acetamiprid  | 0.2                   | 79.1           | 1.9            | 4.5            | 2.0                  | 80.7           | 5.5            | 7.3            |
|              | 1.0                   | 85.4           | 6.1            | 1.5            | 10                   | 87.1           | 1.7            | 6.5            |
|              | 10.0                  | 78.7           | 0.9            | 1.8            | 100                  | 80.3           | 6.9            | 3.3            |
| Clothianidin | 0.2                   | 95.2           | 0.1            | 0.9            | 2.0                  | 99.0           | 6.6            | 1.2            |
|              | 1.0                   | 100.6          | 1.5            | 3.7            | 10                   | 104.6          | 3.0            | 6.4            |
|              | 10.0                  | 91.4           | 5.4            | 5.8            | 100                  | 95.1           | 6.5            | 4.0            |
| Dinotefuran  | 0.2                   | 87.1           | 3.6            | 5.3            | 2.0                  | 91.5           | 2.4            | 0.8            |

|              |      |       |     |     |     |       |     |     |
|--------------|------|-------|-----|-----|-----|-------|-----|-----|
|              | 1.0  | 101.6 | 6.8 | 2.4 | 10  | 106.7 | 0.7 | 5.8 |
|              | 10.0 | 101.0 | 6.3 | 2.4 | 100 | 106.1 | 4.8 | 3.5 |
| Flonicamid   | 0.2  | 101.4 | 1.1 | 1.5 | 2.0 | 106.5 | 2.7 | 7.4 |
|              | 1.0  | 102.9 | 4.3 | 4.4 | 10  | 108.0 | 4.2 | 0.6 |
|              | 10.0 | 94.2  | 0.2 | 4.7 | 100 | 98.9  | 1.4 | 6.3 |
| Imidacloprid | 0.2  | 92.3  | 4.7 | 3.4 | 2.0 | 106.1 | 4.6 | 4.4 |
|              | 1.0  | 90.9  | 4.8 | 0.9 | 10  | 104.5 | 5.4 | 5.9 |
|              | 10.0 | 94.3  | 1.7 | 7.8 | 100 | 108.4 | 4.6 | 1.5 |
| Imidaclothiz | 0.2  | 94.4  | 2.7 | 5.6 | 2.0 | 103.8 | 4.6 | 2.7 |
|              | 1.0  | 96.4  | 0.2 | 4.3 | 10  | 106.0 | 7.1 | 1.5 |
|              | 10.0 | 93.0  | 0.9 | 0.7 | 100 | 102.3 | 4.4 | 3.8 |
| Thiacloprid  | 0.2  | 78.8  | 6.8 | 0.3 | 2.0 | 70.9  | 6.8 | 7.5 |
|              | 1.0  | 81.6  | 2.1 | 1.0 | 10  | 73.4  | 2.0 | 4.6 |
|              | 10.0 | 84.6  | 2.4 | 0.5 | 100 | 76.1  | 5.7 | 4.6 |
| Thiamethoxam | 0.2  | 93.9  | 5.5 | 4.0 | 2.0 | 104.2 | 5.1 | 6.3 |
|              | 1.0  | 96.0  | 6.0 | 6.0 | 10  | 106.6 | 0.5 | 3.4 |
|              | 10.0 | 93.2  | 2.0 | 3.8 | 100 | 103.5 | 7.7 | 1.6 |
